# Supplementary material
Source: MDPI journal article supplement (https://www.mdpi.com/2411-5142/9/1/12)
Supplement: s1 [file s1]

**Table S1.** Anthropometric variables of all women

| VARIABLE                 | PHYSICAL ACTIVITY |                        | P<br>VALUE | PR<br>(CI 95%)   |
|--------------------------|-------------------|------------------------|------------|------------------|
|                          | ACTIVE<br>N (%)   | SEDENTA<br>RY<br>N (%) |            |                  |
| <b>BMI</b>               |                   |                        |            |                  |
| Normal                   | 116 (31.44)       | 99 (31.94)             | 0.755      | 0.95 (0.79;1.14) |
| Overweight               | 131 (35.50)       | 102 (32.90)            |            | 1.02 (0.85;1.22) |
| Obesity                  | 122 (33.06)       | 109 (35.16)            |            |                  |
| <b>FMI</b>               |                   |                        |            |                  |
| Normal                   | 78 (21.43)        | 59 (19.47)             | 0.815      | 1.04 (0.90;1.20) |
| Overweight               | 140 (38.46)       | 121 (39.93)            |            | 1.03 (0.90;1.19) |
| Obesity                  | 146 (40.11)       | 123<br>(940.59)        |            |                  |
| <b>WC</b>                |                   |                        |            |                  |
| Risk-free                | 123 (33.06)       | 96 (30.67)             | 0.552      | 1.00 (0.81;1.24) |
| High risk                | 105 (28.23)       | 83 (26.52)             |            | 1.08 (0.92;1.26) |
| Very high risk           | 144 (38.71)       | 134 (42.81)            |            |                  |
| <b>WHtR</b>              |                   |                        |            |                  |
| Low risk                 | 113 (30.38)       | 96 (30.67)             | 0.934      | 0.99 (0.90;1.10) |
| High risk                | 259 (69.62)       | 217 (69.33)            |            |                  |
| <b>WHR</b>               |                   |                        |            |                  |
| Baixo risco              | 94 (25.27)        | 79 (25.24)             | 0.993      | 1.00 (0.91;1.09) |
| Alto risco               | 278 (74.73)       | 234 (74.76)            |            |                  |
| <b>Bone mass</b>         |                   |                        |            |                  |
| Normal                   | 155 (44.67)       | 135 (45.92)            | 0.331      | 1.04 (0.85;1.27) |
| Osteopenia               | 111 (31.99)       | 104 (35.37)            |            | 0.84 (0.63;1.12) |
| Osteoporosis             | 81 (23.34)        | 55 (18.71)             |            |                  |
| <b>Appendicular Mass</b> |                   |                        |            |                  |
| Lean                     | 53 (14.29)        | 51 (16.29)             | 0.466      | 1.14 (0.80;1.62) |
|                          | 318 (85.71)       | 262 (83.71)            |            |                  |
| Low Discharge            |                   |                        |            |                  |

**Table S2.** Body indices derived from anthropometric and DEXA measurements of women who have not gone through menopause.

| VARIABLE   | PHYSICAL ACTIVITY |                    | P<br>VALUE | PR (CI 95%)      |
|------------|-------------------|--------------------|------------|------------------|
|            | ACTIVE<br>N (%)   | SEDENTARY<br>N (%) |            |                  |
| BMI        | 82 (36.61)        | 76 (42.94)         | 0.048      | 0.73 (0.55;0.97) |
| NORMAL     | 80 (35.71)        | 43 (24.29)         |            | 1.00 (0.76;1.31) |
| Overweight | 62 (27.68)        | 58 (32.77)         |            |                  |
| Obesity    |                   |                    |            |                  |

|                   |             |             |       |                  |
|-------------------|-------------|-------------|-------|------------------|
| FMI               |             |             |       |                  |
| Normal            | 59 (27.06)  | 45 (26.01)  | 0.847 | 0.99 (0.79;1.24) |
| Overweight        | 77 (35.32)  | 58 (33.53)  |       | 1.04 (0.85;1.28) |
| Obesity           | 82 (37.61)  | 70 (40.46)  |       |                  |
| WC                |             |             |       |                  |
| Risk-free         | 92 (40.89)  | 81 (45.00)  | 0.608 | 0.85 (0.63;1.16) |
| High risk         | 64 (28.44)  | 44 (24.44)  |       | 0.94 (0.71;1.23) |
| Very high risk    | 69 (30.67)  | 55 (30.56)  |       |                  |
| WHtR              |             |             |       |                  |
| Low risk          | 91 (40.44)  | 86 (47.78)  | 0.139 | 0.87 (0.73;1.04) |
| High risk         | 134 (59.56) | 94 (52.22)  |       |                  |
| WHR               |             |             |       |                  |
| Baixo risco       | 83 (36.89)  | 72 (40)     | 0.522 | 0.95 (0.81;1.11) |
| Alto risco        | 142 (63.11) | 108 (60)    |       |                  |
| Bone mass         |             |             |       |                  |
| Normal            | 122 (60.10) | 89 (54.60)  | 0.000 |                  |
| Osteopenia        | 48 (23.65)  | 65 (39.88)  |       | 1.49 (1.10;2.02) |
| Osteoporosis      | 33 (16.26)  | 9 (5.52)    |       | 0.43 (0.21;0.86) |
| Appendicular Mass | Lean        |             |       |                  |
| Low               | 31 (13.84)  | 35 (19.44)  | 0.130 | 1.40 (0.90;2.18) |
| Discharge         | 193 (86.16) | 145 (80.56) |       |                  |

**Table S3.** Anthropometric variables of postmenopausal women

| VARIABLE       | PHYSICAL ACTIVITY |                    | P<br>VALUE | PR (CI 95%)      |
|----------------|-------------------|--------------------|------------|------------------|
|                | ACTIVE<br>N (%)   | SEDENTARY<br>N (%) |            |                  |
| <b>BMI</b>     |                   |                    |            |                  |
| Normal         | 34 (23.45)        | 23 (17.29)         | 0.232      | 1.19 (0.96;1.49) |
| Overweight     | 51 (35.17)        | 59 (44.36)         |            |                  |
| Obesity        | 60 (41.38)        | 51 (38.35)         |            |                  |
| <b>FMI</b>     |                   |                    |            |                  |
| Normal         | 19 (13.01)        | 14 (10.77)         | 0.648      | 1.06 (0.90;1.24) |
| Overweight     | 63 (43.15)        | 63 (48.46)         |            |                  |
| Obesity        | 64 (43.84)        | 53 (40.77)         |            |                  |
| <b>WC</b>      |                   |                    |            |                  |
| Risk-free      | 31 (21.09)        | 15 (11.28)         | 0.081      | 1.26 (0.97;1.64) |
| High risk      | 41 (27.89)        | 39 (29.32)         |            |                  |
| Very high risk | 75 (51.02)        | 79 (59.40)         |            |                  |
| <b>WHtR</b>    |                   |                    |            |                  |
| Low risk       | 22 (14.97)        | 10 (7.52)          | 0.050      | 1.08 (1.00;1.18) |
| High risk      | 125 (85.03)       | 123 (92.48)        |            |                  |
| <b>WHR</b>     |                   |                    |            |                  |
| Baixo risco    | 11 (7.48)         | 7 (5.26)           | 0.449      | 1.02 (0.96;1.08) |

|                          |             |             |       |                  |
|--------------------------|-------------|-------------|-------|------------------|
| Alto risco               | 136 (92.52) | 126 (94.74) |       |                  |
| <b>Bone mass</b>         |             |             |       |                  |
| Normal                   | 33 (22.92)  | 46 (35.11)  |       |                  |
| Osteopenia               | 63 (43.75)  | 39 (29.77)  | 0.027 | 0.69 (0.53;0.91) |
| Osteoporosis             | 48 (33.33)  | 46 (35.11)  |       | 0.84 (0.64;1.10) |
| <b>Appendicular Mass</b> |             |             |       |                  |
| <b>Lean</b>              |             |             |       |                  |
|                          | 22 (14.97)  | 16 (12.03)  |       |                  |
| Low Discharge            | 125 (85.03) | 117 (87.97) | 0.474 | 0.80 (0.44;1.46) |

**Table S4.** Anthropometric variables of physiological, premature, and early postmenopausal women.

| Variable       | PHYSIOLOGICAL     |                    | P VALUE | PREMATURE         |                    | P VALUE | PRECOCIOUS        |                    | P VALUE |
|----------------|-------------------|--------------------|---------|-------------------|--------------------|---------|-------------------|--------------------|---------|
|                | PHYSICAL ACTIVITY |                    |         | PHYSICAL ACTIVITY |                    |         | PHYSICAL ACTIVITY |                    |         |
|                | ACTIVE<br>N (%)   | SEDENTARY<br>N (%) |         | ACTIVE<br>N (%)   | SEDENTARY<br>N (%) |         | ACTIVE<br>N (%)   | SEDENTARY<br>N (%) |         |
| <b>BMI</b>     |                   | 11(15.07)          |         |                   |                    |         |                   |                    |         |
| Normal         | 20(25.00)         | 34 (46.58)         | 0.177   | 4(16.67)          | 2(9.09)            | 0.336   | 10(24.39)         | 10(26.32)          | 0.248   |
| Overweight     | 27(33.75)         | 28 (38.36)         |         | 12(50.00)         | 8(36.36)           |         | 12(29.27)         | 17(44.74)          |         |
| Obesity        | 33(41.25)         |                    |         | 8(33.33)          | 12(54.55)          |         | 19(46.34)         | 11(28.95)          |         |
| <b>FMI</b>     |                   | 6(8.33)            |         |                   |                    |         |                   |                    |         |
| Normal         | 9(11.25)          | 35(48.61)          | 0.770   | 4(16.67)          | 1(5.00)            | 0.423   | 5(12.20)          | 7(18.42)           | 0.402   |
| Overweight     | 35(43.75)         | 31(43.06)          |         | 10(41.67)         | 8(40.00)           |         | 18(43.90)         | 20(52.63)          |         |
| Obesity        | 36(45.00)         |                    |         | 10(41.67)         | 11(55.00)          |         | 18(43.90)         | 11(28.95)          |         |
| <b>WC</b>      |                   | 10(13.70)          |         |                   |                    |         |                   |                    |         |
| Risk-free      | 16(20.00)         | 42(57.53)          | 0.407   | 6(25.00)          | 0(0.00)            | 0.032   | 7(17.07)          | 5(13.16)           | 0.519   |
| High risk      | 38(47.50)         | 21(28.77)          |         | 12(50.00)         | 17(77.27)          |         | 25(60.98)         | 20(52.63)          |         |
| Very high risk | 26(32.50)         |                    |         | 6(25.00)          | 5(22.73)           |         | 9(21.95)          | 13(34.21)          |         |
| <b>WHtR</b>    |                   | 7(9.59)            |         |                   |                    |         |                   |                    |         |
| Low risk       | 11(13.75)         | 66(90.41)          | 0.462   | 3(12.50)          | 0(00.00)           | 0.086   | 6(14.63)          | 3(7.89)            | 0.346   |
| High risk      | 69(86.25)         |                    |         | 21(87.50)         | 22(100.00)         |         | 35(85.37)         | 35(92.11)          |         |
| <b>WHR</b>     |                   | 5(6.85)            |         |                   |                    |         |                   |                    |         |
| Low            | 5 (6.25)          | 68(93.15)          | 1.000   | 1(4.17)           | 0(0.00)            | 0.333   | 3(7.32)           | 2(5.26)            | 0.708   |
| High risk      | 75(93.75)         |                    |         | 23(95.83)         | 22(100.00)         |         | 38(92.68)         | 36(94.74)          |         |

|                               |           |           |       |           |           |       |           |           |       |
|-------------------------------|-----------|-----------|-------|-----------|-----------|-------|-----------|-----------|-------|
| <b>Bone mass</b>              |           |           |       |           |           |       |           |           |       |
| Normal                        | 15(18.99) | 25(34.72) | 0.084 | 9(39.13)  | 13(59.09) | 0.345 | 9(22.50)  | 8(21.62)  | 0.167 |
| Osteopenia                    | 37(46.84) | 25(34.72) |       | 8(34.78)  | 4(18.18)  |       | 18(45.00) | 10(27.03) |       |
| Osteoporosis                  | 27(34.18) | 22(30.56) |       | 6(26.09)  | 5(22.73)  |       | 13(32.50) | 19(51.35) |       |
| <b>Appendicular lean mass</b> |           |           |       |           |           |       |           |           |       |
| Low                           | 11(13.75) | 8(10.96)  | 0.633 | 3(12.50)  | 1(4.55)   | 0.339 | 6(14.63)  | 7(18.42)  | 0.765 |
| Discharge                     | 69(86.25) | 65(89.04) |       | 21(87.50) | 21(95.45) |       | 35(85.37) | 31(81.58) |       |

**Table S5.** Prevalence ratio adjusted for age, race and skin color, of the overall sample.

| <b>Variable</b>               | <b>PR (CI 95%)*</b> | <b>PR (CI 95%)**</b> | <b>PR (CI 95%)***</b> |
|-------------------------------|---------------------|----------------------|-----------------------|
| <b>BMI overweight</b>         | 0.99 (0.89;1.09)    | 0.97 (0.87;1.07)     | 0.99 (0.89;1.09)      |
| <b>BMI obesity</b>            | 1.11 (0.89;1.32)    | 1.02 (0.82;1.22)     | 1.11(0.89;1.32)       |
| <b>FMI overweight</b>         | 1.16 (0.91;1.41)    | 1.07 (0.84;1.31)     | 1.16 (0.91;1.41)      |
| <b>FMI obesity</b>            | 1.05 (0.92;1.17)    | 1.02 (0.90;1.14)     | 1.04 (0.92;1.16)      |
| <b>WC High risk</b>           | 1.09 (0.86;1.33)    | 1.00 (0.78;1.22)     | 1.09 (0.85;1.32)      |
| <b>WC Very high risk</b>      | 1.12 (0.85;1.32)    | 1.04 (1.01;1.24)     | 1.12 (0.94;1.15)      |
| <b>WHtR</b>                   | 1.11 (1.00;1.24)    | 0.99 (0.91;1.31)     | 1.11 (0.82;1.16)      |
| <b>WHR</b>                    | 1.12 (0.91;1.31)    | 1.00 (0.91;1.32)     | 1.12 (0.81;1.19)      |
| <b>Bone mass osteopenia</b>   | 1.12 (0.91;1.33)    | 1.04 (0.92;1.32)     | 1.12 (0.85;1.22)      |
| <b>Bone mass osteoporosis</b> | 0.95 (0.92;1.32)    | 0.93 (0.82;1.07)     | 0.94 (0.82;1.04)      |
| <b>Lean Mass Index</b>        | 1.08 (0.82;1.07)    | 1.08 (0.85;1.31)     | 1.07 (0.84;1.30)      |

**Table S6.** Prevalence ratio adjusted for age, race and skin color, of women who did not go through menopause.

| <b>Variável</b>               | <b>PR (CI 95%)*</b> | <b>PR (CI 95%)**</b> | <b>PR (CI 95%)***</b> |
|-------------------------------|---------------------|----------------------|-----------------------|
| <b>BMI overweight</b>         | 0.88 (0.76;1.01)    | 0.86 (0.74;0.98)     | 0.88 (0.76;1.01)      |
| <b>BMI obesity</b>            | 1.11 (0.85;1.37)    | 1.00 (0.76;1.24)     | 1.11 (0.85;1.37)      |
| <b>FMI overweight</b>         | 1.13 (0.82;1.44)    | 0.99 (0.71;1.29)     | 1.13 (0.82;1.44)      |
| <b>FMI obesity</b>            | 1.05 (0.90;1.20)    | 1.02 (0.88;1.17)     | 1.04 (0.90;1.19)      |
| <b>WC High risk</b>           | 0.96 (0.70;1.23)    | 0.86 (0.63;1.12)     | 0.95 (0.70;1.23)      |
| <b>WC Very high risk</b>      | 1.04 (0.91;1.18)    | 0.97 (0.85;1.09)     | 1.04 (0.91;1.18)      |
| <b>WHtR</b>                   | 0.97 (0.75;1.20)    | 0.84 (0.65;1.04)     | 0.97 (0.75;1.19)      |
| <b>WHR</b>                    | 1.05 (0.82;1.28)    | 0.92 (0.72;1.14)     | 1.05 (0.82;1.28)      |
| <b>Bone mass osteopenia</b>   | 1.52 (1.23;1.78)    | 1.36 (1.09;1.62)     | 1.52 (1.23;1.78)      |
| <b>Bone mass osteoporosis</b> | 0.82 (0.60;1.06)    | 0.73 (0.54;0.94)     | 0.82 (0.60;1.06)      |
| <b>Lean Mass Index</b>        | 1.23 (0.92;1.53)    | 1.23 (0.93;1.53)     | 1.23 (0.92;1.53)      |

\* Adjusted for age; \*\* Adjusted by Race/Color; \*\*\*Adjusted for age and race/color

**Table S7.** Prevalence ratio adjusted for age and race, skin color, and women who have already gone through menopause.

| <b>Variable</b>               | <b>PR (CI 95%)*</b> | <b>PR (CI 95%)**</b> | <b>PR (CI 95%)***</b> |
|-------------------------------|---------------------|----------------------|-----------------------|
| <b>BMI overweight</b>         | 0.88 (0.76;1.01)    | 0.86 (0.74;0.98)     | 0.88 (0.76;1.01)      |
| <b>BMI obesity</b>            | 1.13 (0.75;1.53)    | 1.18 (0.79;1.58)     | 1.18 (0.79;1.58)      |
| <b>FMI overweight</b>         | 1.17 (0.74;1.61)    | 1.18 (0.75;1.62)     | 1.18 (0.75;1.62)      |
| <b>FMI obesity</b>            | 1.03 (0.81;1.26)    | 1.04 (0.82;1.27)     | 1.04 (0.82;1.27)      |
| <b>WC High risk</b>           | 1.49 (0.94;2.05)    | 1.51 (0.95;2.07)     | 1.52 (0.96;2.08)      |
| <b>WC Very high risk</b>      | 1.29 (1.03;1.55)    | 1.28 (1.03;1.55)     | 1.29 (1.04;1.56)      |
| <b>WHtR</b>                   | 1.60 (1.00;2.20)    | 1.64 (1.03;2.23)     | 1.65 (1.04;2.25)      |
| <b>WHR</b>                    | 1.26 (0.68;1.85)    | 1.25 (0.67;1.84)     | 1.28 (0.69;1.87)      |
| <b>Bone mass osteopenia</b>   | 0.67 (0.44;0.93)    | 0.65 (0.43;0.90)     | 0.67 (0.43;0.93)      |
| <b>Bone mass osteoporosis</b> | 0.92 (0.79;1.05)    | 0.91 (0.78;1.04)     | 0.92 (0.79;1.05)      |
| <b>Lean Mass Index</b>        | 0.87 (0.55;1.23)    | 0.84 (0.52;1.20)     | 0.85 (0.53;1.20)      |

\* Adjusted for age; \*\* Adjusted by Race/Color; \*\*\*Adjusted for age and race/color
